# Supplementary material
Source: MDPI journal article supplement (https://www.mdpi.com/2073-4344/13/6/958)
Supplement: s1 [file s1]

## Supporting Information

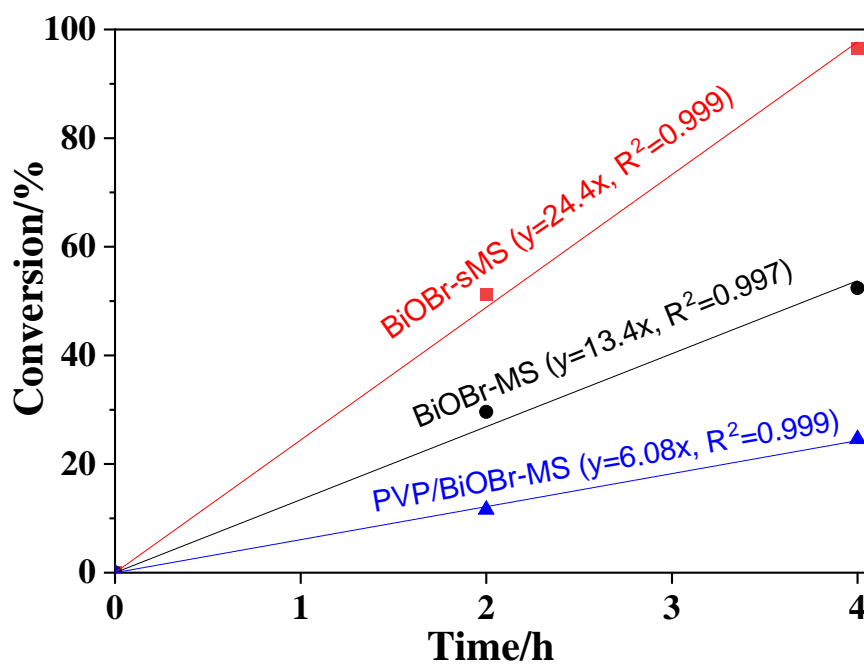

**Figure S1.** Time-dependent aerobic photo-oxidation of BzOH over BiOBr nanostructures. Conditions: 20 mg catalyst, O<sub>2</sub> balloon and 50 mM BzOH in 10 mL CH<sub>3</sub>CN, illuminated with Xenon lamp.
